# Supplementary material for: Real-World Treatment Outcomes and Safety of Afatinib in Advanced Squamous Cell Lung Cancer Progressed after Platinum-Based Doublet Chemotherapy and Immunotherapy (SPACE Study)
Source: MDPI journal article supplement (doi:10.3390/cancers15235568), 2023-11-24
Supplement: s1 [file s1]

## Supplementary Tables

**Table S1.** List of the 51 actionable genes in the Cancer-PRIME™ next-generation sequencing panel.

|       |        |       |        |        |       |      |
|-------|--------|-------|--------|--------|-------|------|
| ABL1  | BTK    | ERBB3 | GNA11  | MET    | PPARG | TP53 |
| AKT1  | CCND1  | ERBB4 | GNAQ   | MTOR   | PTCH1 | TSC1 |
| ALK   | CDK4   | ESR1  | HRAS   | MYCN   | PTEN  | TSC2 |
| AR    | CDK6   | FGFR1 | IDH1   | NOTCH1 | RAF1  |      |
| BAP1  | CDKN2A | FGFR2 | IDH2   | NRAS   | RET   |      |
| BRAF  | DDR2   | FGFR3 | KIT    | PDGFRA | ROS1  |      |
| BRCA1 | EGFR   | FGFR4 | KRAS   | PD-L1  | SMO   |      |
| BRCA2 | ERBB2  | FLT3  | MAP2K1 | PIK3CA | STK11 |      |

**Table S2.** Disease control rate (DCR) according to different clinicopathologic parameters in response evaluable patients (n=37)

|                   | DCR  | p-value | Univariate        |         |
|-------------------|------|---------|-------------------|---------|
|                   |      |         | OR (95% CI)       | p-value |
| All               | 59.5 |         |                   |         |
| Age               |      | 0.549   |                   |         |
| <70               | 55.0 |         | reference         |         |
| ≥70               | 64.7 |         | 1.50 (0.39-5.66)  | 0.550   |
| Sex               |      | 0.633   |                   |         |
| Male              | 57.6 |         | reference         |         |
| Female            | 75.0 |         | 2.21 (0.21-23.56) | 0.511   |
| Smoking History   |      | >0.999  |                   |         |
| Never             | 50.0 |         | reference         |         |
| Ever              | 60.0 |         | 1.50 (0.09-26.01) | 0.781   |
| Smoking intensity |      | 0.708   |                   |         |
| <30 pack-years    | 50.0 |         | reference         |         |
| ≥30 pack-years    | 63.0 |         | 1.70 (0.39-7.36)  | 0.478   |
| ECOG PS           |      | 0.711   |                   |         |
| 0, 1              | 57.1 |         | Reference         |         |

|                                                           |      |                   |           |
|-----------------------------------------------------------|------|-------------------|-----------|
| ≥2                                                        | 66.7 | 1.50 (0.31-7.25)  | 0.614     |
| Stage*                                                    |      | 0.465             |           |
| IVA                                                       | 64.0 | 2.13 (0.51-9.01)  | 0.303     |
| IVB                                                       | 45.5 | reference         |           |
| Differentiation                                           |      | 0.356             |           |
| Well/moderate                                             | 70.6 | 3.20 (0.52-19.84) | 0.212     |
| Poor/unknown                                              | 42.9 | reference         |           |
| No. of previous lines of systemic therapy before afatinib |      | 0.488             | 0.708     |
| 1-3                                                       | 64.0 | 1.78 (0.44-7.17)  |           |
| ≥4                                                        | 50.0 | reference         |           |
| Type of previous systemic therapy†                        |      | >0.999            | 0.771     |
| Chemoimmunotherapy                                        | 50.0 | reference         |           |
| Platinum-doublet followed by immunotherapy                | 60.7 | 1.55 (0.19-12.64) | 0.894     |
| Involved organ                                            |      | 0.742             |           |
| <3                                                        | 57.1 | reference         |           |
| ≥3                                                        | 62.5 | 1.25 (0.33-4.73)  | 0.743     |
| Brain metastasis                                          |      | 0.408             |           |
| No                                                        | 45.0 | 2.30 (0.43-12.25) | 0.328     |
| Yes                                                       | 42.9 | reference         |           |
| Liver metastasis                                          |      | 0.228             |           |
| No                                                        | 65.5 | 3.17 (0.63-16.05) | 0.164     |
| Yes                                                       | 37.5 | reference         |           |
| PD-L1 TPS‡                                                |      | 0.733             | 0.735     |
| <1%                                                       | 70.0 | 1.46 (0.25-8.43)  | 0.502     |
| 1-49%                                                     | 53.8 | 0.73 (0.15-3.47)  | 0.480     |
| ≥50%                                                      | 61.5 | reference         |           |
| Afatinib starting dose                                    |      | >0.999            |           |
| 30mg                                                      | 60.0 | 1.03 (0.24-4.53)  | 0.968     |
| 40mg                                                      | 59.3 | reference         |           |
| Dose modification                                         |      |                   | 0.099     |
| No                                                        | 47.6 | 0.176             | reference |
| Yes                                                       | 75.0 | 3.30 (0.79-13.64) |           |

Multivariate analysis was not necessary because there was only one variable with a p-value < 0.1.

\*After excluding 1 patient with stage IIIC

†After excluding 1 patient who received immunotherapy followed by platinum-doublet

‡After excluding 1 patient without data on PD-L1 expression

OR, odds ratio; CI, confidence interval; ECOG PS, Eastern Cooperative Oncology Group performance status; PD-L1, programmed death ligand 1; TPS, tumor proportion score.

**Table S3.** TTF analyses results according to the clinicopathological parameters of all study subjects (n=42)

|                                                     | Median TTF<br>(months) | Univariate       |         |
|-----------------------------------------------------|------------------------|------------------|---------|
|                                                     |                        | HR (95% CI)      | p-value |
| All                                                 | 2.1                    |                  |         |
| Age                                                 |                        |                  | 0.576   |
| <70                                                 | 2.0                    | reference        |         |
| ≥70                                                 | 2.1                    | 1.19 (0.64-2.25) |         |
| Sex                                                 |                        |                  | 0.236   |
| Male                                                | 1.9                    | 1.89 (0.66-5.45) |         |
| Female                                              | 4.7                    | reference        |         |
| Smoking history                                     |                        |                  | 0.599   |
| Never                                               | 2.1                    | 1.47 (0.35-6.23) |         |
| Ever                                                | 2.1                    | reference        |         |
| Smoking intensity                                   |                        |                  | 0.684   |
| <30 pack-years                                      | 1.5                    | reference        |         |
| ≥30 pack-years                                      | 2.1                    | 1.16 (0.56-2.42) |         |
| ECOG PS                                             |                        |                  | 0.286   |
| 0, 1                                                | 2.1                    | 1.52 (0.71-3.25) |         |
| ≥2                                                  | 2.8                    | reference        |         |
| Stage*                                              |                        |                  | 0.196   |
| IVA                                                 | 2.3                    | reference        |         |
| IVB                                                 | 1.8                    | 1.59 (0.79-2.18) |         |
| Differentiation                                     |                        |                  | 0.474   |
| Well to moderate                                    | 2.7                    | reference        |         |
| Poor or unknown,                                    | 1.5                    | 1.39 (0.56-3.48) |         |
| No. of previous systemic therapy<br>before afatinib |                        |                  | 0.920   |

|                                                 |     |                  |       |
|-------------------------------------------------|-----|------------------|-------|
| 1-3                                             | 2.1 | 1.28 (0.62-2.41) |       |
| ≥4                                              | 2.1 | reference        |       |
| Types of previous systemic therapy <sup>†</sup> |     |                  | 0.187 |
| Chemoimmunotherapy                              | 1.6 | 1.74 (0.52-5.88) |       |
| Platinum-doublet followed by immunotherapy      | 2.1 | 0.74 (0.28-1.96) |       |
| Involved organ                                  |     |                  | 0.762 |
| <3                                              | 2.1 | 1.10 (0.58-2.08) |       |
| ≥3                                              | 2.1 | reference        |       |
| Brain metastasis                                |     |                  | 0.420 |
| No                                              | 2.1 | reference        |       |
| Yes                                             | 1.3 | 1.38 (0.63-3.03) |       |
| Liver metastasis                                |     |                  | 0.179 |
| No                                              | 2.3 | reference        |       |
| Yes                                             | 1.8 | 1.76 (0.77-4.02) |       |
| PD-L1 TPS <sup>‡</sup>                          |     |                  | 0.439 |
| <1%                                             | 1.8 | reference        |       |
| 1-49%                                           | 2.0 | 1.32 (0.59-2.92) |       |
| ≥50%                                            | 2.8 | 0.79 (0.35-1.75) |       |
| Afatinib starting dose                          |     |                  | 0.892 |
| 30mg                                            | 1.9 | reference        |       |
| 40mg                                            | 2.1 | 1.05 (0.49-2.23) |       |
| Dose modification                               |     |                  | 0.029 |
| No                                              | 1.5 | 2.07 (1.08-3.97) |       |
| Yes                                             | 3.0 | reference        |       |

Multivariate analysis was not necessary because there was only one variable with a p-value < 0.1.

\*After excluding 1 patient with stage IIIC

<sup>†</sup>After excluding 1 patient who received immunotherapy followed by platinum-doublet

<sup>‡</sup>After excluding 1 patient without data on PD-L1 expression

TTF, time to treatment failure; HR, hazard ratio; CI, confidence interval; ECOG PS, Eastern Cooperative Oncology Group performance status; PD-L1, programmed death-ligand 1; TPS, tumor proportion score

**Table S4.** Overall survival analyses results according to clinicopathological parameters of all study subjects (n=42)

|                                                              | Median OS<br>(months) | Univariate        |         |
|--------------------------------------------------------------|-----------------------|-------------------|---------|
|                                                              |                       | HR (95% CI)       | p-value |
| All                                                          | 6.1                   |                   |         |
| Age                                                          |                       |                   | 0.406   |
| <70                                                          | 7.3                   | reference         |         |
| ≥70                                                          | 5.0                   | 1.37 (0.66-2.85)  |         |
| Sex                                                          |                       |                   | 0.374   |
| Male                                                         | 6.1                   | reference         |         |
| Female                                                       | 7.1                   | 1.082             |         |
| Smoking History                                              |                       |                   | 0.435   |
| Never                                                        | NR                    | reference         |         |
| Ever                                                         | 6.1                   | 2.23 (0.29-16.67) |         |
| Smoking intensity                                            |                       |                   | 0.722   |
| <30 pack-years                                               | 6.5                   | 1.15 (0.52-2.54)  |         |
| ≥30 pack-years                                               | 6.1                   | reference         |         |
| ECOG PS                                                      |                       |                   | 0.341   |
| 0, 1                                                         | 6.1                   | reference         |         |
| ≥2                                                           | 3.4                   | 1.52 (0.64-3.60)  |         |
| Stage*                                                       |                       |                   | 0.829   |
| IVA                                                          | 7.3                   | reference         |         |
| IVB                                                          | 6.1                   | 1.11 (0.43-2.76)  |         |
| Differentiation                                              |                       |                   | 0.468   |
| Well to moderate                                             | 5.0                   | 1.46 (0.53-4.07)  |         |
| Poor/unknown                                                 | 10.3                  | reference         |         |
| No. of previous lines of systemic therapy<br>before afatinib |                       |                   | 0.837   |
| 1-3                                                          | 6.1                   | 1.09 (0.49-2.39)  |         |
| ≥4                                                           | 6.0                   | reference         |         |
| Type of previous systemic therapy†                           |                       |                   | 0.801   |
| Chemoimmunotherapy                                           | 2.7                   | 1.77 (0.29-10.67) |         |
| Platinum-doublet followed by<br>immunotherapy                | 6.8                   | reference         |         |
| Involved organ                                               |                       |                   | 0.435   |
| <3                                                           | 6.8                   | reference         |         |
| ≥3                                                           | 5.0                   | 1.34 (0.64-2.78)  |         |
| Brain metastasis                                             |                       |                   | 0.472   |
| No                                                           | 6.8                   | reference         |         |
| Yes                                                          | 5.0                   | 1.43 (0.54-3.77)  |         |
| Liver metastasis                                             |                       |                   | 0.388   |
| No                                                           | 7.3                   | reference         |         |
| Yes                                                          | 4.7                   | 1.46 (0.62-3.45)  |         |
| PD-L1 TPS‡                                                   |                       |                   | 0.320   |
| <1%                                                          | 2.8                   | reference         |         |
| 1-49%                                                        | 5.0                   | 1.14 (0.45-2.90)  |         |
| ≥50%                                                         | 10.0                  | 0.59 (0.24-1.46)  |         |
| Afatinib starting dose                                       |                       |                   | 0.073   |
| 30mg                                                         | 3.7                   | 2.11 (0.93-4.77)  |         |

|                   |     |                  |       |
|-------------------|-----|------------------|-------|
| 40mg              | 7.3 | reference        |       |
| Dose modification |     |                  | 0.262 |
| No                | 5.0 | 1.54 (0.72-3.30) |       |
| Yes               | 6.1 | reference        |       |

---

Multivariate analysis was not necessary because there was only one variable with a p-value < 0.1.

\*After excluding 1 patient with stage IIIC

†After excluding 1 patient who received immunotherapy followed by platinum-doublet

‡After excluding 1 patient without data on PD-L1 expression

OS, overall survival; HR, hazard ratio; CI, confidence interval; ECOG PS, Eastern Cooperative Oncology Group performance status; PD-L1, programmed death ligand 1; TPS, tumor proportion score.
